# Supplementary material for: FGF19 promotes epithelial-mesenchymal transition in hepatocellular carcinoma cells by modulating the GSK3β/β- catenin signaling cascade via FGFR4 activation
Source: Oncotarget. 2015 Oct 20;7(12):13575–86. doi: 10.18632/oncotarget.6185 (PMC4924662; doi:10.18632/oncotarget.6185)
Supplement: Supplementary file 1 [file oncotarget-07-13575-s001.pdf]

## FGF19 promotes epithelial-mesenchymal transition in hepatocellular carcinoma cells by modulating the GSK3 $\beta$ / $\beta$ -catenin signaling cascade via FGFR4 activation

### Supplementary Materials

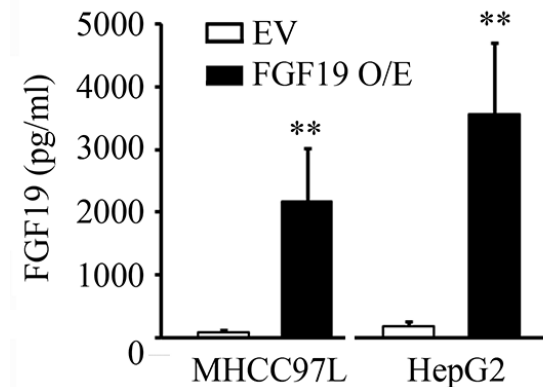

**Supplementary Figure S1:** Overexpression of FGF19 in MHCC97L and HepG2 cell led to a significant increase in secreted FGF19 proteins in the supernatant ( $n = 6$ , \*\* $P < 0.01$ ).

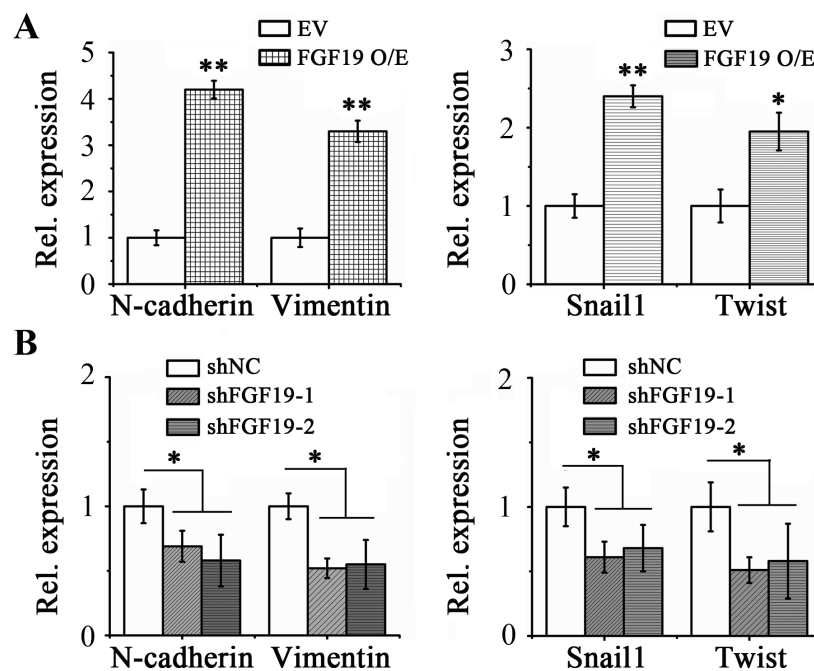

**Supplementary Figure S2:** A. RT-qPCR analysis showed ectopic expression of FGF19 (FGF19 O/E) in MHCC97L cells increased the expression levels of N-cadherin, Vimentin, Snail1 and Twist. B. RT-qPCR analysis showed knockdown of FGF19 (shFGF19-1 and shFGF19-2) in MHCC97H cells led to a decrease in the expression of N-cadherin, Vimentin, Snail1 and Twist. All error bars in this figure represent S.E.M. ( $n = 3$ , \* $P < 0.05$ ; \*\* $P < 0.01$ ).

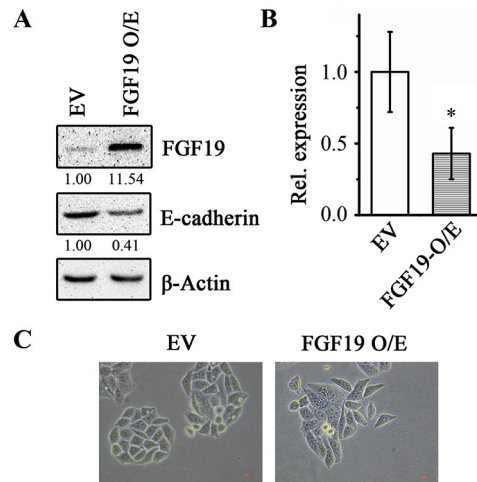

**Supplementary Figure S3:** A–B. Western blotting and RT-qPCR analysis showed overexpression of FGF19 (FGF19 O/E) in liver normal HL7702 cells led to a suppression of E-cadherin expression compared with the control cells expressing empty vector (EV). C. Overexpression of FGF19 facilitates epithelial HL7702 cells to mesenchymal morphology. All error bars in this figure represent S.E.M. ( $n = 3$ ,  $*P < 0.05$ ).

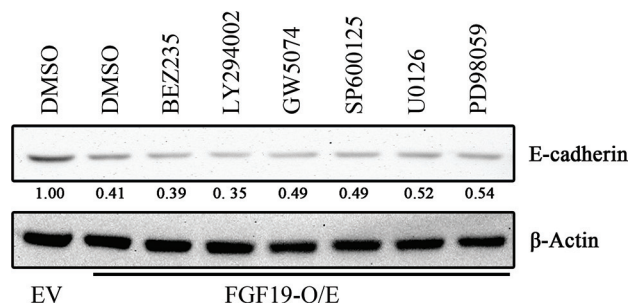

**Supplementary Figure S4:** Western blotting analysis showed treatment with PI3K inhibitors BEZ235 (20 nM) and LY294002 (10  $\mu$ M), p38 inhibitor GW5074 (10  $\mu$ M), JNK inhibitor SP600125 (10  $\mu$ M) and MEK inhibitors U0126 (1  $\mu$ M) and PD98059 (10  $\mu$ M) for 24 hrs cannot prevent the reduction of E-cadherin expression in FGF19 overexpressing MHCC97L cells.

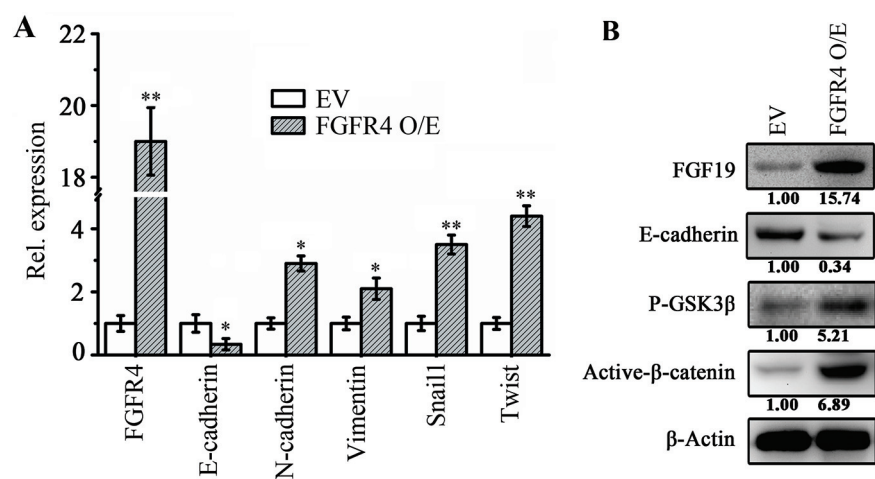

**Supplementary Figure S5:** A. RT-qPCR analysis showed overexpression of FGFR4 (FGFR4 O/E) in MHCC97L cells led to a decrease in E-cadherin expression and an increase in the expression of N-cadherin, Vimentin, Snail1 and Twist. B. Western blotting analysis showed overexpression of FGFR4 (FGFR4 O/E) in MHCC97L cells activated GSK3β/ β-catenin axis. All error bars in this figure represent S.E.M. ( $n = 3$ ,  $*P < 0.05$ ;  $**P < 0.01$ ).

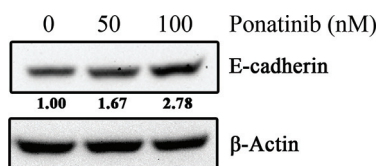

**Supplementary Figure S6:** Western blotting analysis showed treatment with FGFR4 inhibitor ponatinib for 24 hrs enhanced the expression of E-cadherin in MHCC97H cells.
